# Supplementary material for: Heat-Killed Saccharomyces boulardii Alleviates Dextran Sulfate Sodium-Induced Ulcerative Colitis by Restoring the Intestinal Barrier, Reducing Inflammation, and Modulating the Gut Microbiota
Source: MDPI journal article supplement (doi:10.3390/nu16050702), 2024-02-29
Supplement: s1 [file s1]

## Supplementary

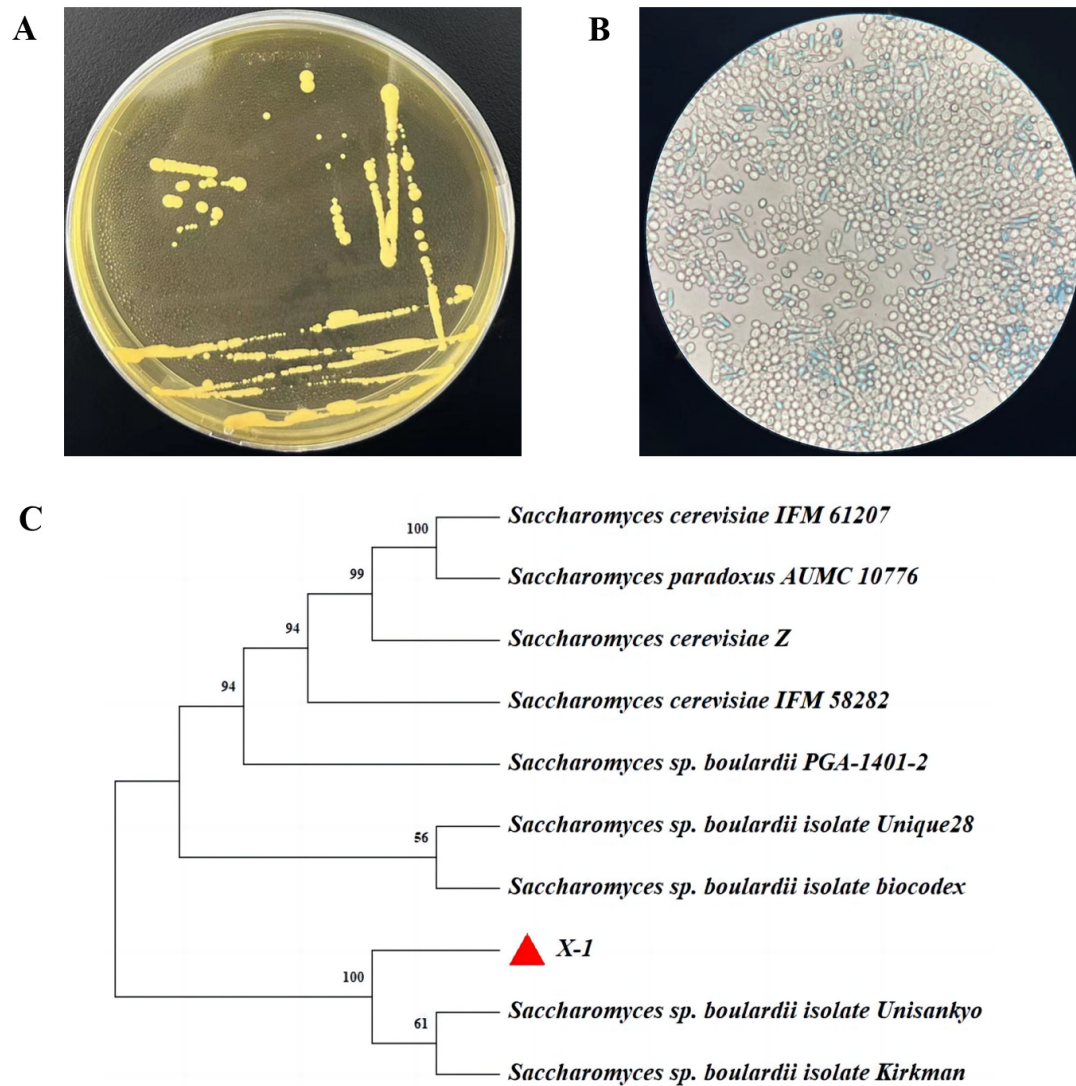

**Figure S1.** Identification of *S. boulardii*. (A) Colony morphology on YPD agar. (B) Cell morphology under a light microscope after staining with methylene blue (1000×). (C) Phylogenetic tree constructed from the alignment and comparison of 16S rRNA gene sequences using NCBI (X-1 represents the *S. boulardii* strain selected in this study).

**Table S1.** Disease activity index scoring criteria.

| Score | Body weight loss (%) | Fecal traits      | Hematochezia                          |
|-------|----------------------|-------------------|---------------------------------------|
| 0     | ≤0                   | Normal stools     | Normal                                |
| 1     | 1-5                  | Soft stools       | Small amounts of blood-streaked feces |
| 2     | 6-10                 | Loose stools      | A certain amount of bloody feces      |
| 3     | 11-15                | Semi-loose stools | Conspicuous blood-wrapped feces       |
| 4     | >15                  | Watery stools     | Visible rectal bleeding               |

**Table S2.** Sequences of primers used for quantitative real-time PCR (RT-qPCR).

| Target Gene   | Nucleotide Sequence of Primer (5' to 3') |                      |
|---------------|------------------------------------------|----------------------|
|               | Forward                                  | Reverse              |
| TNF- $\alpha$ | CCCTCACACTCACAAACCAC                     | ACAAGGTACAACCCATCGGC |
| IL-1 $\beta$  | GTCGCTCAGGGTCACAAGAA                     | CCACACGTTGACAGCTAGGT |
| IL-6          | GGAGCCCACCAAGAACGATA                     | GTCACCAGCATCAGTCCCAA |
| Occludin      | TTTCCTGCGGTGACTTCTCC                     | AAAACAGTGGTGGGGAACGT |
| ZO-1          | GAGCAGGCTTTGGAGGAGAC                     | TGGGACAAAAGTCCGGGAAG |
| GAPDH         | ATGGTGAAGGTCGGTGTGAA                     | TTTGCCGTGAGTGGAGTCAT |
